# Supplementary material for: STS loaded PCL-MECM based hydrogel hybrid scaffolds promote meniscal regeneration via modulating macrophage phenotype polarization
Source: Royal Society of Chemistry journal article supplement (doi:10.1039/d2bm00526c), 2023-01-01
Supplement: d2bm00526c1.pdf [file d2bm00526c1.pdf]

## Supplementary Material

### **STS load PCL- MECM based hydrogel hybrid scaffold promote meniscal regeneration via modulating macrophage phenotype polarization**

Muzhe Li<sup>a,b</sup> †, Han Yin<sup>a</sup> †, Mingxue Chen<sup>c</sup> †, Haotian Deng<sup>a</sup>, Guangzhao Tian<sup>a</sup>, Weimin Guo<sup>d</sup>, Guoliang Yi<sup>b</sup>, Quanyi Guo<sup>a\*</sup>, Zhiwei Chen<sup>b\*</sup>, Shuyun Liu<sup>a\*</sup>

<sup>a</sup> Institute of Orthopedics, The First Medical Center, Chinese PLA General Hospital, Beijing Key Lab of Regenerative Medicine in Orthopedics, Key Laboratory of Musculoskeletal Trauma and War Injuries PLA, No. 28 Fuxing Road, Haidian District, Beijing 100853, China

<sup>b</sup> Department of Orthopedics, The First Affiliated Hospital, Hengyang medical school, University of South China, Hengyang 421000, China

<sup>c</sup> Department of Orthopedic Surgery, Beijing Jishuitan Hospital, Fourth Clinical College of Peking University, Beijing 100035, China

<sup>d</sup> Department of Orthopaedic Surgery, Guangdong Provincial Key Laboratory of Orthopedics and Traumatology, First Affiliated Hospital, Sun Yat-Sen University, No.58 Zhongshan Second Road, Yuexiu District, Guangzhou 510080, Guangdong, China

† First author: Muzhe Li, Han Yin, and Mingxue Chen have contributed equally to the work.

\* Corresponding authors: Shuyun Liu; Zhiwei Chen; Quanyi Guo

(1) Shuyun Liu, Institute of Orthopedics, The First Medical Center, Chinese PLA General Hospital; Beijing Key Lab of Regenerative Medicine in Orthopedics; Key Laboratory of Musculoskeletal Trauma & War Injuries PLA; 28 Fuxing Road, Haidian District, Beijing 100853, PR China. Email: clear\_ann@163.com

(2) Zhiwei Chen, Department of Orthopedics, The First Affiliated Hospital, Hengyang medical school, University of South China, No. 69, Chuanshan Road, Hengyang City, Hunan Province 421000, China E-mail: czw9915@sina.com

(3) Quanyi Guo, Institute of Orthopedics, The First Medical Center, Chinese PLA General Hospital; Beijing Key Lab of Regenerative Medicine in Orthopedics; Key Laboratory of Musculoskeletal Trauma & War Injuries PLA; 28 Fuxing Road, Haidian District, Beijing 100853, PR China. Email: doctorguo\_301@163.com

## Methods

### Preparation of inner MECM and outer MECM

Pig knee meniscus (n = 40) was purchased from abattoir. The meniscus was placed in sterile phosphate buffered saline (PBS) at pH 7.6. The meniscus is cut into the medial and lateral parts (Figure S1). Cut the inner and outer of the meniscus into pieces about 1 mm in size. The fragments were decellularized using the method described in the previous literature[1]. Briefly, the tissue sections were placed into a hypotonic Tris-HCL buffer solution (10 mM Tris-HCL, pH 8.0) and 6 cycles of freezing (at -80°C) and thawing (at 37°C) were conducted. The tissue sections slurry was homogenized and treated with 0.25% trypsin (Gibco, USA) in PBS for 24 h at 37°C with vigorous agitation. The trypsin solution was replaced with the fresh one at every 4 h. Trypsinized tissue sections slurry was washed with a hypertonic buffer solution (1.5 M NaCl in 50 mM Tris-HCL, pH 7.6) and treated with nuclease solution (50 U ml<sup>-1</sup> DNase (Sigma) and 1 U ml<sup>-1</sup> RNase A (Sigma) in 10 mM Tris-HCL, pH 7.5) with gentle agitation at 37°C for 4 h. To remove all the enzymes, the enzyme-treated tissue sections slurry was washed with the hypotonic Tris-HCL solution for 20 h following treatment with 1% Triton X-100 solution (J.T.BAKER) for 24 h. The decellularized meniscus tissue was washed at least for 3 days to remove all the detergent. Inner MECM and outer MECM are stored in sterile glassware and stored at 4°C. Safranin O and TB staining of the outer MECM, inner MECM, and the outer and inner of the native meniscus. The specific operation method shall be carried out according to the manufacturer's plan.

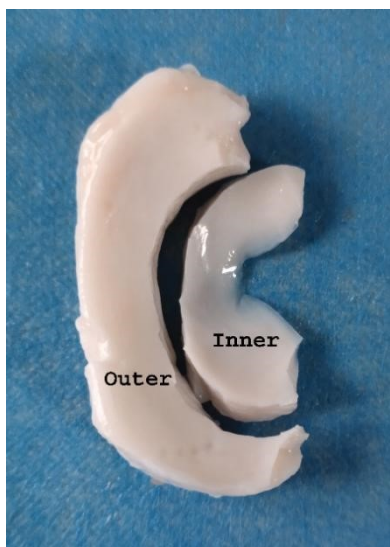

Figure S1: Macroscopic view of the inner and outer of native meniscus.

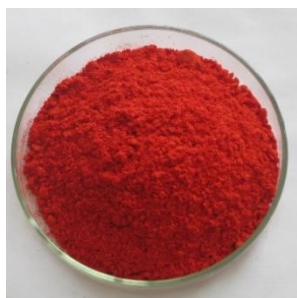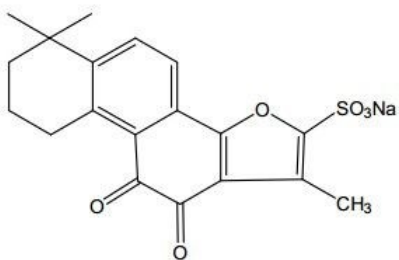

Figure S2: The molecular structure of STS.

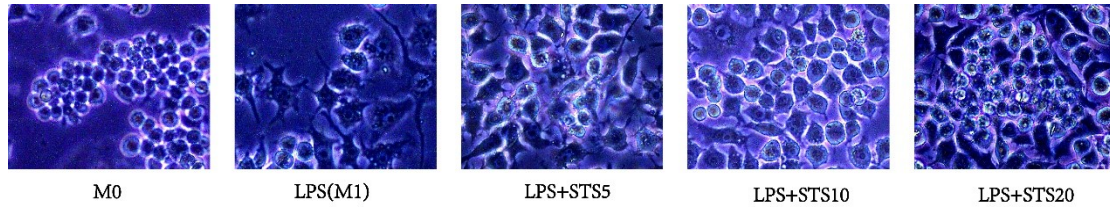

Figure S3: The RAW264.7 macrophages morphology changes after STS treatment

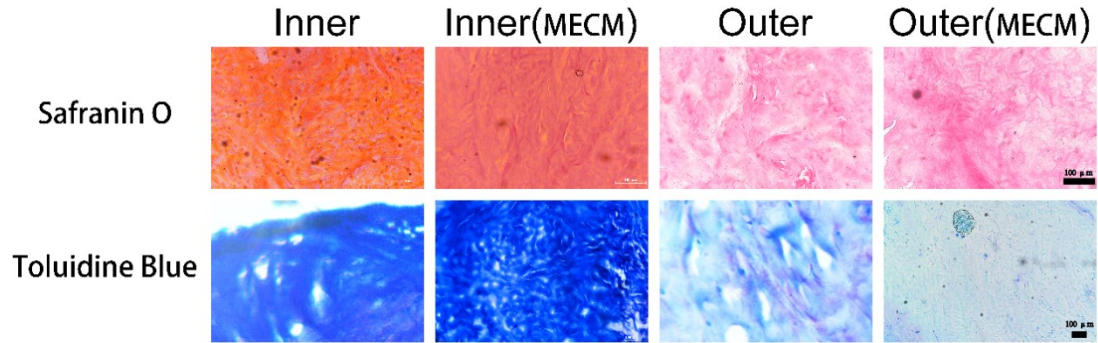

Figure S4: Safranin O and TB staining of the outer MECM, inner MECM, and the outer and inner of the native meniscus.

| Gene                    | Direction of primer | The primer sequences(5'-3') |
|-------------------------|---------------------|-----------------------------|
| IL-1 $\beta$ ( mouse )  | FORWARD             | TACAGGCTCCGAGATGAACA        |
|                         | REVERSE             | AGGCCACAGGTATTTTGTCG        |
| iNOS(mouse)             | FORWARD             | GTTCTCAGCCCAACAATACAAGA     |
|                         | REVERSE             | GTGGACGGGTCGATGTCAC         |
| CD206(mouse)            | FORWARD             | ATGGATGTTGATGGCTACTGG       |
|                         | REVERSE             | TTCTGACTCTGGACACTTGC        |
| Retnal (mouse)          | FORWARD             | TTGCAACTGCCTGTGCTTAC        |
|                         | REVERSE             | CTGGGTTCTCCACCTCTTCA        |
| Gapdh ( mouse )         | FORWARD             | CTTTGTCAAGCTCATTTCCTGG      |
|                         | REVERSE             | TCTTGCTCAGTGCCTTGC          |
| IL-1 $\beta$ ( rabbit ) | FORWARD             | TAC AAC AAG AGC TTC CGG CA  |
|                         | REVERSE             | GGC CAC AGG TAT CTT GTC GT  |
| MMP-13(rabbit)          | FORWARD             | AGGAAGACCTCCAGTTTGCAGAG     |
|                         | REVERSE             | GCTGCATTCTCCTTCAGGATTC      |
| BCL-2(Rabbit)           | FORWARD             | CGGAAGGGACTGGACCAGAGA       |
|                         | REVERSE             | GCTGTCATGGGGATCACCTCC       |
| Caspase-3(Rabbit)       | FORWARD             | AAGCCACGGTGATGAAGGAGT       |
|                         | REVERSE             | TCGGCAAGCCTGAATAATGAA       |
| SOD-1(Rabbit)           | FORWARD             | GCACGGATTCCATGTCCACCA       |
|                         | REVERSE             | TCACATTACCCAGGTCGCCCA       |

|                  |         |                       |
|------------------|---------|-----------------------|
| Gapdh ( rabbit ) | FORWARD | TTGTCGCCATCAATGATCCAT |
|                  | REVERSE | GATGACCAGCTTCCCGTTCTC |

Table S1: The primer sequences

|                       |                                                                                    |
|-----------------------|------------------------------------------------------------------------------------|
| Project               | parameter                                                                          |
| 3D Bioprinter         | PanoSpace BioPro                                                                   |
| Nozzle 1              | pcl                                                                                |
| Moving speed          | 5 mm/s                                                                             |
| Temperature           | 130°C                                                                              |
| Air pressure          | 470kpa                                                                             |
| Platform temperature: | room temperature                                                                   |
| FillStyle             | Cross lines layer by layer                                                         |
| Effect picture        |  |

Table S2: Parameters of the designed 3D-printed constructs

1. Pati, F., et al., *Printing three-dimensional tissue analogues with decellularized extracellular matrix bioink*. Nat Commun, 2014. **5**: p. 3935.
